# Supplementary material
Source: PubMed Central journal article supplement (PMC4122685)
Supplement: NIHMS606090-supplement-Supplementary_Materials.pdf [file NIHMS606090-supplement-Supplementary_Materials.pdf]

**Online Supplement for:**

Meador et al. Breastfeeding in Children of Women on Antiepileptic Drugs: Cognitive Outcomes at Age 6 Years. JAMA Pediatr. 2014 Jun 16. doi: 10.1001/jamapediatrics.2014.118. [Epub ahead of print] PMID: 24934501

**eTable 1.** Pregnancy average AED dose comparing breastfed to non-breastfed for each AED for the n=177 mothers in the primary analysis.

**eTable 2.** Adjusted means (95% CIs) for age-6 cognitive domains by AED comparing breastfed vs. non-breastfed children.

**eTable 3.** Results from Analysis of Sensitivity of Results to Unmeasured Covariates.

**eTable 4.** Summary of missing data for age 6 IQ and for breastfeeding by AED group.

**eTable 5.** Summary of missing Age 6 IQ data by breastfeeding status.

**eTable 6.** Results from Repeated Measures Model: Estimated Means by Age and Breastfeeding Status.

**eTable 1. Pregnancy average AED dose comparing breastfed to non-breastfed for each AED for the n=177 mothers in the primary analysis.**

| <b>AED Group</b>     | <b>Breastfed</b> | <b>N</b> | <b>Pregnancy Average AED Dose (mg)</b> | <b>95% CIs</b> | <b>p-value for comparison of Breastfed to Non-breastfed</b> |
|----------------------|------------------|----------|----------------------------------------|----------------|-------------------------------------------------------------|
| <b>Carbamazepine</b> | Yes              | 22       | 750                                    | 575 : 925      | 0.36                                                        |
|                      | No               | 24       | 851                                    | 704 : 999      |                                                             |
|                      | ALL              | 46       | 803                                    | 693 : 913      |                                                             |
| <b>Lamotrigine</b>   | Yes              | 27       | 511                                    | 422 : 600      | 0.93                                                        |
|                      | No               | 33       | 505                                    | 412 : 598      |                                                             |
|                      | ALL              | 60       | 508                                    | 445 : 571      |                                                             |
| <b>Phenytoin</b>     | Yes              | 16       | 379                                    | 334 : 423      | 0.56                                                        |
|                      | No               | 20       | 404                                    | 327 : 480      |                                                             |
|                      | ALL              | 36       | 393                                    | 348 : 438      |                                                             |
| <b>Valproate</b>     | Yes              | 11       | 998                                    | 667 : 1329     | 0.37                                                        |
|                      | No               | 24       | 1235                                   | 900 : 1570     |                                                             |
|                      | ALL              | 35       | 1160                                   | 915 : 1406     |                                                             |

AED=antiepileptic drug; CIs=confidence intervals

**eTable 2. Adjusted means (95% CIs) for age-6 cognitive domains by AED comparing breastfed vs. non-breastfed children.\***

|                         | <b>N<br/>Breastfed</b> | <b>N<br/>Not Breastfed</b> | <b>Breastfed</b> | <b>Not Breastfed</b> |
|-------------------------|------------------------|----------------------------|------------------|----------------------|
| <b>Verbal Index</b>     | 79                     | 102                        | 105 (103:108)    | 102 (100:104)        |
| <b>CBZ</b>              | 23                     | 24                         | 109 (105:114)    | 104 (100:108)        |
| <b>LTG</b>              | 27                     | 34                         | 109 (105:113)    | 107 (103:111)        |
| <b>PHT</b>              | 17                     | 20                         | 105 (100:110)    | 103 (99:108)         |
| <b>VPA</b>              | 12                     | 24                         | 98 (91:105)      | 92 (87:97)           |
|                         |                        |                            |                  |                      |
| <b>Non-verbal Index</b> | 79                     | 103                        | 105 (103:108)    | 104 (102:106)        |
| <b>CBZ</b>              | 23                     | 25                         | 102 (97:107)     | 103 (99:108)         |
| <b>LTG</b>              | 27                     | 34                         | 112 (109:115)    | 109 (106:111)        |
| <b>PHT</b>              | 17                     | 20                         | 104 (100:108)    | 107 (103:110)        |
| <b>VPA</b>              | 12                     | 24                         | 102 (94:109)     | 99 (94:104)          |
|                         |                        |                            |                  |                      |
| <b>Memory Index</b>     | 78                     | 96                         | 103 (99:107)     | 100 (96:104)         |
| <b>CBZ</b>              | 23                     | 23                         | 106 (98:115)     | 105 (97:114)         |
| <b>LTG</b>              | 27                     | 33                         | 112 (106:118)    | 105 (99:111)         |
| <b>PHT</b>              | 17                     | 19                         | 97 (88:106)      | 104 (95:112)         |
| <b>VPA</b>              | 11                     | 21                         | 95 (84:106)      | 89 (80:97)           |
|                         |                        |                            |                  |                      |
| <b>Executive Index</b>  | 78                     | 99                         | 105 (102:107)    | 104 (101:106)        |
| <b>CBZ</b>              | 23                     | 24                         | 104 (99:109)     | 106 (101:111)        |
| <b>LTG</b>              | 27                     | 32                         | 110 (107:114)    | 107 (104:110)        |
| <b>PHT</b>              | 17                     | 20                         | 97 (92:102)      | 107 (103:112)        |
| <b>VPA</b>              | 11                     | 23                         | 105 (98:112)     | 97 (92:102)          |
|                         |                        |                            |                  |                      |
| <b>BRIEF (parent)</b>   | 68                     | 89                         | 103 (101:106)    | 101 (99:104)         |
| <b>CBZ</b>              | 22                     | 19                         | 99 (95:104)      | 103 (98:108)         |
| <b>LTG</b>              | 26                     | 30                         | 102 (97:107)     | 99 (95:104)          |
| <b>PHT</b>              | 9                      | 18                         | 106 (98:115)     | 99 (93:104)          |
| <b>VPA</b>              | 11                     | 22                         | 109 (101:117)    | 106 (100:111)        |

\*Adjusted for maternal IQ, AED group, AED dose, periconceptional folate, and breastfeeding.  
CIs=confidence intervals; AED=antiepileptic drug, CBZ=carbamazepine, LTG=lamotrigine, PHT=phenytoin, VPA=valproate.

**eTable 3. Results from Analysis of Sensitivity of Results to Unmeasured Covariates.<sup>A</sup>**

| D <sup>B</sup>                                                         | G <sup>C</sup>                                          | B <sup>D</sup>                                                                 | 95% Confidence Interval for B |
|------------------------------------------------------------------------|---------------------------------------------------------|--------------------------------------------------------------------------------|-------------------------------|
| Difference Between Breastfed and Non-Breastfed in Unobserved Covariate | Coefficient of Unobserved Covariate in Regression Model | Estimated Effect of Breastfeeding Taking into Account the Unobserved Covariate |                               |
| -0.8                                                                   | -6                                                      | -0.8                                                                           | (-4.8 : 3.2)                  |
|                                                                        | -4                                                      | 0.8                                                                            | (-3.2 : 4.8)                  |
|                                                                        | -2                                                      | 2.4                                                                            | (-1.6 : 6.4)                  |
| -0.4                                                                   | -6                                                      | 1.6                                                                            | (-2.4 : 5.6)                  |
|                                                                        | -4                                                      | 2.4                                                                            | (-1.6 : 6.4)                  |
|                                                                        | -2                                                      | 3.2                                                                            | (-0.8 : 7.2)                  |
| 0.4                                                                    | -6                                                      | 6.4                                                                            | (2.4 : 10.4)                  |
|                                                                        | -4                                                      | 5.6                                                                            | (1.6 : 9.6)                   |
|                                                                        | -2                                                      | 4.8                                                                            | (0.8 : 8.8)                   |
| 0.8                                                                    | -6                                                      | 8.8                                                                            | (4.8 : 12.8)                  |
|                                                                        | -4                                                      | 7.2                                                                            | (3.2 : 11.2)                  |
|                                                                        | -2                                                      | 5.6                                                                            | (1.6 : 9.6)                   |

- A. The sensitivity analysis follows methods outlined in Yin et al<sup>26</sup> and Rosenbaum.<sup>27</sup> Sensitivity of the estimated effect of breastfeeding to the existence of an unmeasured covariate was assessed as follows: the unmeasured covariate was assumed to be continuous and to follow a standard normal distribution. Yin et al<sup>26</sup> and Rosenbaum<sup>27</sup> show that the effect of adding the unmeasured covariate to the primary model is:  $B = B^* - G \times D$   
Here,  $B^*$  is the estimated breastfeeding effect from the primary model without taking into account the unmeasured covariate. In our analysis,  $B^* = 4$  IQ points with 95% confidence interval = (0 : 8). D, G and B are explained in the footnotes below.
- B. D is the mean difference between the breastfed and non-breastfed groups in the unobserved covariate. A hypothetical range for D was determined by considering all continuous covariates in the dataset, standardizing them according to a standard normal distribution, and looking at the mean differences between the breastfed and non-breastfed groups. The range for D includes and extends beyond the maximum and minimum differences observed in the data.
- C. G is the hypothetical effect of the unobserved covariate in the regression model after it has been added to the primary model, which includes the breastfeeding variable and the other observed covariates. A range for G was determined by adding the standardized continuous observed covariates to the primary model. The range for G includes and extends beyond the maximum and minimum estimated effects obtained in this way. Only negative values for G are considered in this table since the corresponding positive values result in values for B that are already included in the table.
- D. B is the effect of breastfeeding after adding the unmeasured covariate to the primary model. Note that most effects are positive as in our primary analysis. Negative effects have confidence intervals that include zero.

**eTable 4. Summary of missing data for age 6 IQ and for breastfeeding by AED group.**

| <b>AED Group</b>                                                       | <b>N</b> | <b>Missing Age 6 IQ<br/>n (%)</b> | <b>Missing Breastfeeding<br/>n (%)</b> | <b>Missing Either<br/>n (%)</b> |
|------------------------------------------------------------------------|----------|-----------------------------------|----------------------------------------|---------------------------------|
| <b>Carbamazepine</b>                                                   | 92       | 32 (35)                           | 20 (22)                                | 45 (49)                         |
| <b>Lamotrigine</b>                                                     | 99       | 25 (25)                           | 18 (18)                                | 38 (38)                         |
| <b>Phenytoin</b>                                                       | 55       | 15 (27)                           | 4 (7)                                  | 18 (33)                         |
| <b>Valporate</b>                                                       | 62       | 13 (21)                           | 17 (27)                                | 26 (42)                         |
| <b>ALL AEDs</b>                                                        | 308      | 85 (28)                           | 59 (19)                                | 127 (41)                        |
| <b>p-value for difference<br/>across groups (Chi-<br/>square test)</b> |          | 0.26                              | 0.042                                  | 0.24                            |

AED=antiepileptic drug

**eTable 5. Summary of missing Age 6 IQ data by breastfeeding status.**

| <b>Breastfeeding Status</b>                                       | <b>N</b> | <b>Missing Age 6 IQ<br/>n (%)</b> |
|-------------------------------------------------------------------|----------|-----------------------------------|
| <b>YES</b>                                                        | 102      | 24 (24)                           |
| <b>NO</b>                                                         | 147      | 44 (30)                           |
| <b>Breastfeeding Data Missing</b>                                 | 59       | 17 (29)                           |
| <b>ALL</b>                                                        | 308      | 85 (28)                           |
| <b>p-value for difference across groups<br/>(Chi-square test)</b> |          | 0.52                              |

**eTable 6. Results from Repeated Measures Model: Estimated Means by Age and Breastfeeding Status.\***

|                 | <b>Breastfed<br/>Mean (CI)<br/>n</b> | <b>Not Breastfed<br/>Mean (CI)<br/>n</b> | <b>Mean Difference (CI)</b> | <b>P Value</b> |
|-----------------|--------------------------------------|------------------------------------------|-----------------------------|----------------|
| <b>Age 2</b>    | 95 (92 : 99)<br>n=78                 | 91 (88 : 94)<br>n=102                    | 5 (0 : 9)                   | 0.063          |
| <b>Age 3</b>    | 100 (97:104)<br>n=83                 | 96 (93 :99)<br>n=115                     | 4 (-1 : 9)                  | 0.085          |
| <b>Age 4.5</b>  | 108 (104:111)<br>n=74                | 101 (98:104)<br>n=103                    | 7 (2 : 11)                  | 0.007          |
| <b>Age 6</b>    | 108 (105:111)<br>n=78                | 103 (100:105)<br>n=103                   | 5 (2 : 9)                   | 0.003          |
| <b>All Ages</b> | 103 (100:106)                        | 98 (95:100)                              | 5 (1 : 9)                   | 0.007          |

\* To assess whether results were similar across all ages when IQ was measured, a repeated measures model was estimated using all available data at ages 2, 3, 4.5 and 6. This model incorporated within-subject correlations over time and included child age along with breastfeeding status, maternal IQ, AED, folate and standardized dose as covariates. At each age, adjusted means were compared for breastfed vs. non-breastfed children. 229 children had breastfeeding information and testing data available from at least one time point; 97 (42%) were breastfed and 132 (58%) were non-breastfed.
